# Supplementary material
Source: PubMed Central journal article supplement (PMC6015844)
Supplement: rspb20180761supp1.pdf [file rspb20180761supp1.pdf]

## Supplementary Information for:

Leza M, Watrous K, Bratu J, Woodard SH. Effects of neonicotinoid insecticide exposure and monofloral diet on nest-founding bumblebee queens. *Proceedings of the Royal Society of London B: Biological Sciences*.  
doi: 10.1098/rspb.2018.0761

### Contents:

- I. RATIONALE FOR IMIDACLOPRID EXPOSURE LEVEL USED IN EXPERIMENT
- II. NUTRITIONAL CONTENT OF POLLENS USED IN EXPERIMENT
- III. QUEEN MORTALITY AND BROOD PRODUCTION
- IV. MODEL SELECTION
- IV. REFERENCES

## I. RATIONALE FOR IMIDACLOPRID EXPOSURE LEVEL USED IN EXPERIMENT

The imidacloprid exposure level used in this experiment was based on a survey of available literature of neonicotinoid levels used in lab and field experiments or estimated from environmental screening. Table S1 (below) is a summary of the surveyed literature on field- and laboratory-based neonicotinoid levels (bb = bumblebee, hb = honeybee).

| <b>Citation</b>            | <b>Type of experiment: field (with country in parentheses) or laboratory study</b> | <b>Levels of imidacloprid found in field or tested in laboratory</b>                                                                                                       |
|----------------------------|------------------------------------------------------------------------------------|----------------------------------------------------------------------------------------------------------------------------------------------------------------------------|
| David et al., 2016 (1)     | Field (England; bb)                                                                | pollen in urban area: <0.36 - <20 ppb                                                                                                                                      |
| Botias et al., 2017 (2)    | Field (England; bb)                                                                | urban area – late spring : <0.72 - <2.2 ng/g<br>urban area - early summer: <0.72 - <10 ng/g<br>arable area – midsummer: <0.72 - <2.2 ng/g                                  |
| Mullin et al., 2010 (3)    | Field (USA; hb)                                                                    | wax samples: 13.6 - 2.4ppb<br>pollen samples: 206.0 - 6.2 ppb                                                                                                              |
| Stewart et al., 2014 (4)   | Field (USA)                                                                        | Preseason: 4.0±5.5 ng/g<br>Wildflowers (adjacent to cotton): 1.1±6.0 ng/g                                                                                                  |
| Lambert et al., 2013 (5)   | Field (France; hb)                                                                 | Limit of detection (LOD): 0.4ng/g<br>Limit of quantification (LOQ): 9.6ng/g<br>Honey-LOD: 0.2 ng/g<br>Honey-LOQ: 3.9 ng/g<br>Pollen-LOD: 2.6 ng/g<br>Pollen-LOQ: 12.0 ng/g |
| Genersch et al., 2010 (6)  | Field (Germany)                                                                    | 3 ppb in one pollen sample (of 215 total samples)                                                                                                                          |
| Whitehorn et al., 2012 (7) | Laboratory (bb)                                                                    | pollen treated with 6 ng/g imidacloprid, plus 0.7 ng/g in nectar                                                                                                           |
| Feltham et al., 2014 (8)   | Laboratory (bb)                                                                    | pollen treated with 6 ppb imidacloprid, plus 0.7 ppb in sugar syrup                                                                                                        |

|                                      |                           |                                                                                                                                                                                                                                                                                                                                                                  |
|--------------------------------------|---------------------------|------------------------------------------------------------------------------------------------------------------------------------------------------------------------------------------------------------------------------------------------------------------------------------------------------------------------------------------------------------------|
| Gill <i>et al.</i> , 2012 (9)        | Laboratory (bb)           | 10 ppb imidacloprid in sugar syrup plus a synthetic pyrethroid insecticide                                                                                                                                                                                                                                                                                       |
| Williamson <i>et al.</i> , 2014 (10) | Laboratory (hb)           | Pilot study with the concentrations 10 and 100 nM, to identify that all pesticides being used at a sublethal dose (as defined by Desneux <i>et al.</i> 2007); a 10 nM dose of all pesticides was selected for use and was in the range of the reported values from field collected nectar and pollen (Blacquiere <i>et al.</i> 2012; Sanchez-Bayo and Goka 2014) |
| Powner <i>et al.</i> , 2016 (11)     | Laboratory (bb)           | 10 nM in 50% sucrose (with and without 670 nm light)                                                                                                                                                                                                                                                                                                             |
| Moffat <i>et al.</i> , 2016 (12)     | Laboratory (bb)           | 2.5 ppb, field relevant levels: 10 nM                                                                                                                                                                                                                                                                                                                            |
| Creswell <i>et al.</i> , 2012 (13)   | Laboratory (bb)           | 125, 50, 20, 8, 3.2, 1.28, 0.51, 0.2 and 0.08 µg/g                                                                                                                                                                                                                                                                                                               |
| Tasei <i>et al.</i> , 2000 (14)      | Laboratory (bb)           | 10µg/kg/ and 25 µg/kg in syrup and 6µg/kg/ 16 µg/kg in pollen                                                                                                                                                                                                                                                                                                    |
| Gill <i>et al.</i> , 2012 (9)        | Semifield experiment (bb) | 10 ppb sucrose solution                                                                                                                                                                                                                                                                                                                                          |
| Mommaerts <i>et al.</i> , 2010 (15)  | Laboratory (bb)           | Use the maximum field recommended concentration (MFRC): 200 ppb                                                                                                                                                                                                                                                                                                  |

## II. NUTRITIONAL CONTENT OF POLLENS USED IN EXPERIMENT

Table S2 (below) shows the crude nutrient content of rockrose (*Cistus*) and heather (*Erica*) pollen used in experiment, with the nutrient content of the 50/50 mixed diet group estimated by averaging the two. Data from Di Pasquale et al. 2013.

| <b>Pollen diet</b>                                    | <b>Proteins (%)</b> | <b>Lipids (%)</b> | <b>Sugars (%)</b> | <b>Amino acids (g)</b> | <b>Antioxidants (μmol)</b> |
|-------------------------------------------------------|---------------------|-------------------|-------------------|------------------------|----------------------------|
| <b><i>Cistus</i></b>                                  | 12                  | 6.9               | 5.2               | 11.9                   | 103                        |
| <b><i>Erica</i></b>                                   | 14.8                | 7.4               | 4.8               | 16.27                  | 196                        |
| <b>Mixed<br/>(<i>Cistus</i> and<br/><i>Erica</i>)</b> | 13.4                | 7.15              | 5                 | 14.085                 | 149.5                      |

### III. QUEEN MORTALITY AND BROOD PRODUCTION

Table S3 shows a summary of the numbers of queens that were originally used in the experiment (by treatment group), the numbers of surviving queens, and the numbers and proportions of queens with various stages of brood (eggs, larvae, pupae, and adults) in the nest when they were collected at the end of the experiment.

| Group      | No. Queens | No. died before laid eggs | No. which laid eggs | % with eggs | No. with larvae | % with larvae | No. with pupae | % with pupae | No. with adults | % with adults |
|------------|------------|---------------------------|---------------------|-------------|-----------------|---------------|----------------|--------------|-----------------|---------------|
| Un-treated | 90         | 28                        | 62                  | 68.9        | 52              | 57.8          | 26             | 28.9         | 1               | 1.1           |
| IMD-A      | 45         | 16                        | 29                  | 64.4        | 21              | 46.7          | 3              | 6.7          | 1               | 2.2           |
| IMD-B      | 45         | 35                        | 10                  | 22.2        | 7               | 15.6          | 1              | 2.2          | 0               | 0             |

#### IV. MODEL SELECTION

##### Model Selection

| Fixed Factors             | Loglik          | AICc         | Delta       | Weight       |
|---------------------------|-----------------|--------------|-------------|--------------|
| <b>Treatment + Pollen</b> | <b>-136.000</b> | <b>283.1</b> | <b>0.00</b> | <b>0.388</b> |
| <b>Treatment</b>          | <b>-138.005</b> | <b>283.8</b> | <b>0.78</b> | <b>0.262</b> |
| <b>Treatment*Pollen</b>   | <b>-132.492</b> | <b>284.6</b> | <b>1.59</b> | <b>0.175</b> |
| Null                      | -152.570        | 306.7        | 23.63       | 0.000        |
| Pollen                    | -150.886        | 307.1        | 24.00       | 0.000        |

Table S4. Candidate Cox mixed effects model selection for survival to the end of the experiment of queens exposed to one of three imidacloprid treatments and one of three pollen treatments. Bolded models are those within two AICc units of the best fitting model. Colony is included as random term in all analyses.

| Fixed Factors    | Loglik         | AICc         | Delta       | Weight       |
|------------------|----------------|--------------|-------------|--------------|
| <b>Treatment</b> | <b>-67.661</b> | <b>145.7</b> | <b>0.00</b> | <b>0.978</b> |
| Treatment+Pollen | -69.364        | 153.4        | 7.71        | 0.021        |
| Treatment*Pollen | -68.000        | 159.6        | 13.90       | 0.001        |
| Null             | -80.321        | 166.8        | 21.11       | 0.000        |
| Pollen           | -82.248        | 174.8        | 29.17       | 0.000        |

Table S5. Candidate LMERs for the survival of queens exposed to one of three imidacloprid treatments and one of three pollen treatments. Colony is included as random term in all analyses.

| Fixed Factors    | Loglik         | AICc         | Delta       | Weight       |
|------------------|----------------|--------------|-------------|--------------|
| <b>Treatment</b> | <b>-97.537</b> | <b>204.9</b> | <b>0.00</b> | <b>0.793</b> |
| Null             | -101.803       | 208.1        | 3.21        | 0.159        |
| Treatment+Pollen | -97.440        | 211.1        | 6.19        | 0.036        |
| Pollen           | -101.732       | 213.3        | 8.39        | 0.012        |
| Treatment*Pollen | -97.191        | 228.1        | 23.24       | 0.000        |

Table S6. Candidate LM for queen activity level when exposed to one of three imidacloprid treatments and one of three pollen treatments. Colony is included as random term in all analyses.

| Fixed Factors              | Loglik          | AICc           | Delta       |
|----------------------------|-----------------|----------------|-------------|
| <b>Treatment</b>           | <b>-369.110</b> | <b>748.220</b> | <b>0.00</b> |
| <b>#Treatment + Pollen</b> | <b>-367.299</b> | <b>748.598</b> | <b>0.38</b> |
| Pollen                     | -380.692        | 771.384        | 23.16       |
| null                       | -521.839        | 1057.567       | 309.35      |

Table S7. Candidate GAMLSS for total number of colony eggs when exposed to one of three imidacloprid treatments and one of three pollen treatments. Subsequent analysis was conducted using model marked with #, as it was more comprehensive and statistically comparable to the simpler model. Colony is included as random term in all analyses.

| Fixed Factors             | Loglik          | AICc           | Delta       |
|---------------------------|-----------------|----------------|-------------|
| <b>#Treatment*Pollen</b>  | <b>-338.377</b> | <b>704.884</b> | <b>0.00</b> |
| <b>Treatment + Pollen</b> | <b>-342.549</b> | <b>705.718</b> | <b>0.83</b> |
| Treatment                 | -347.158        | 709.157        | 4.27        |
| Null                      | -353.431        | 715.495        | 10.61       |
| Pollen                    | -350.932        | 715.913        | 11.03       |

Table S8. Candidate GAMLSS for total number of colony larvae when exposed to one of three imidacloprid treatments and one of three pollen treatments. Subsequent analysis was conducted using model marked with #, as it was more comprehensive and statistically comparable to the simpler model. Colony is included as random term in all analyses.

| Fixed Factors            | Loglik          | AICc           | Delta       |
|--------------------------|-----------------|----------------|-------------|
| <b>#Treatment*Pollen</b> | <b>-114.656</b> | <b>258.905</b> | <b>0.00</b> |
| <b>Treatment</b>         | <b>-121.118</b> | <b>259.072</b> | <b>0.17</b> |
| Treatment + Pollen       | -120.568        | 262.021        | 3.12        |
| Null                     | -133.358        | 272.728        | 13.82       |
| Pollen                   | -132.215        | 274.431        | 15.53       |

Table S9. Candidate GAMLSS for total number of pupae and adults when exposed to one of three imidacloprid treatments and one of three pollen treatments. Subsequent analysis was conducted using model marked with #, as it was more comprehensive and statistically comparable to the simpler model. Colony is included as random term in all analyses.

## V. REFERENCES

1. David A, Botías C, Abdul-Sada A, Nicholls E, Rotheray EL, Hill EM, Goulson D. 2016 Widespread contamination of wildflower and bee-collected pollen with complex mixtures of neonicotinoids and fungicides commonly applied to crops. *Environ. Int.* **88**, 169–178. (doi:<https://doi.org/10.1016/j.envint.2015.12.011>)
2. Botías C, David A, Hill EM, Goulson D. 2017 Quantifying exposure of wild bumblebees to mixtures of agrochemicals in agricultural and urban landscapes. *Environ. Pollut.* **222**, 73–82. (doi:[10.1016/j.envpol.2017.01.001](https://doi.org/10.1016/j.envpol.2017.01.001))
3. Mullin CA, Frazier M, Frazier JL, Ashcraft S, Simonds R, VanEngelsdorp D, Pettis JS. 2010 High levels of miticides and agrochemicals in North American apiaries: implications for honey bee health. *PLoS One* **5**, e9754. (doi:[10.1371/journal.pone.0009754](https://doi.org/10.1371/journal.pone.0009754))
4. Stewart SD *et al.* 2014 Potential exposure of pollinators to neonicotinoid insecticides from the use of insecticide seed treatments in the mid-southern United States. *Environ. Sci. Technol.* **48**, 9762–9769. (doi:[10.1021/es501657w](https://doi.org/10.1021/es501657w))
5. Lambert O, Piroux M, Puyo S, Thorin C, L’Hostis M, Wiest L, Buleté A, Delbac F, Pouliquen H. 2013 Widespread occurrence of chemical residues in beehive matrices from apiaries located in different landscapes of western France. *PLoS One* **8**, e67007. (doi:[10.1371/journal.pone.0067007](https://doi.org/10.1371/journal.pone.0067007))
6. Genersch E *et al.* 2010 The German bee monitoring project: a long term study to understand periodically high winter losses of honey bee colonies. *Apidologie* **41**, 332–352. (doi:[10.1051/apido/2010014](https://doi.org/10.1051/apido/2010014))



7. Whitehorn PR, O'Connor S, Wackers FL, Goulson D. 2012 Neonicotinoid pesticide reduces bumble bee colony growth and queen production. *Science*. **336**, 351–352. (doi:10.1126/science.1215025)
8. Feltham H, Park K, Goulson D. 2014 Field realistic doses of pesticide imidacloprid reduce bumblebee pollen foraging efficiency. *Ecotoxicology* **23**, 317–323. (doi:10.1007/s10646-014-1189-7)
9. Gill RJ, Ramos-Rodriguez O, Raine NE. 2012 Combined pesticide exposure severely affects individual- and colony-level traits in bees. *Nature* **491**, 105–108. (doi:10.1038/nature11585)
10. Williamson SM, Willis SJ, Wright GA. 2014 Exposure to neonicotinoids influences the motor function of adult worker honeybees. *Ecotoxicology* **23**, 1409–1418. (doi:10.1007/s10646-014-1283-x)
11. Powner MB, Salt TE, Hogg C, Jeffery G. 2016 Improving mitochondrial function protects bumblebees from neonicotinoid pesticides. *PLoS One* **11**, e0166531. (doi:10.1371/journal.pone.0166531)
12. Moffat C, Buckland ST, Samson AJ, McArthur R, Chamosa Pino V, Bolland KA, Huang JTJ, Connolly CN. 2016 Neonicotinoids target distinct nicotinic acetylcholine receptors and neurons, leading to differential risks to bumblebees. *Sci. Rep.* **6**. (doi:10.1038/srep24764)
13. Cresswell JE *et al.* 2012 Differential sensitivity of honey bees and bumble bees to a dietary insecticide (imidacloprid). *Zoology* **115**, 365–371. (doi:10.1016/j.zool.2012.05.003)
14. Tasei JN, Lerin J, Ripault G. 2000 Sub-lethal effects of imidacloprid on

bumblebees, *Bombus terrestris* (Hymenoptera: Apidae), during a laboratory feeding test. *Pest Manag. Sci.* **56**, 784–788. (doi:10.1002/1526-4998(200009)56:9<784::AID-PS208>3.0.CO;2-T)

15. Mommaerts V, Reynders S, Boulet J, Besard L, Sterk G, Smagghe G. 2010 Risk assessment for side-effects of neonicotinoids against bumblebees with and without impairing foraging behavior. *Ecotoxicology* **19**, 207–215. (doi:10.1007/s10646-009-0406-2)
